# Supplementary material for: Fluctuation of bone turnover markers’ levels in samples of gingival crevicular fluid after orthodontic stimulus: a systematic review
Source: Springer Nature journal article supplement (doi:10.1186/s13643-021-01860-w), 2022-01-04
Supplement: MOESM3 [file 19999718]

**Search strategy, Medline/Pubmed , assessed as up to date:****01.10.2020**

|                                                                                                                                                                                                                                               |      |
|-----------------------------------------------------------------------------------------------------------------------------------------------------------------------------------------------------------------------------------------------|------|
| #1 periodontal biomarker*                                                                                                                                                                                                                     | 2417 |
| #2 periodontal biomarker* AND orthodont*                                                                                                                                                                                                      | 136  |
| #3 biomarker* AND orthodont*                                                                                                                                                                                                                  | 501  |
| #4 biomarker*[tiab] AND orthodont*                                                                                                                                                                                                            | 233  |
| #5 biomarker*[tiab] AND orthodont*[tiab]                                                                                                                                                                                                      | 93   |
| #6 ((periodontal) AND biological marker) AND orthodont*                                                                                                                                                                                       | 184  |
| #7 GCF AND orthodontic                                                                                                                                                                                                                        | 218  |
| #8 GCF AND biomarkers                                                                                                                                                                                                                         | 492  |
| #9 GCF biomarkers AND orthodont*                                                                                                                                                                                                              | 60   |
| #10 GCF AND orthodont*                                                                                                                                                                                                                        | 214  |
| #11 gingival crevicular fluid                                                                                                                                                                                                                 | 4107 |
| #12 gingival crevicular fluid AND orthodont*                                                                                                                                                                                                  | 307  |
| #13 gingival crevicular fluid AND orthodont* [tiab]                                                                                                                                                                                           | 269  |
| #14 gingival crevicular fluid biomarkers                                                                                                                                                                                                      | 708  |
| #15 gingival crevicular fluid biomarkers AND orthodont*                                                                                                                                                                                       | 75   |
| #16 gingival crevicular fluid[MeSH Terms]                                                                                                                                                                                                     | 3295 |
| #17 (gingival crevicular fluid[MeSH Terms]) AND orthodont*[Title/Abstract]                                                                                                                                                                    | 211  |
| #18 Bone turnover[tiab] AND orthodont*[tiab]                                                                                                                                                                                                  | 78   |
| #19 "bone"[Title/Abstract] AND ("turnover"[Title/Abstract] OR "remodel*"[Title/Abstract]) AND "orthodont*"[Title/Abstract]                                                                                                                    | 747  |
| #20 "bone"[Title/Abstract] AND ("turnover"[Title/Abstract] OR "remodel*"[Title/Abstract]) AND "orthodont*"[Title/Abstract] AND ("biomarker s"[All Fields] OR "biomarkers"[MeSH Terms] OR "biomarkers"[All Fields] OR "biomarker"[All Fields]) | 59   |
