# Supplementary material for: Fluctuation of bone turnover markers’ levels in samples of gingival crevicular fluid after orthodontic stimulus: a systematic review
Source: Springer Nature journal article supplement (doi:10.1186/s13643-021-01860-w), 2022-01-04
Supplement: MOESM4 [file 19999718]

## LILACS search strategy

|                                                              |    |
|--------------------------------------------------------------|----|
| 1. biomarker [Words] and orthodontic [Words]                 | 5  |
| 2. GCF [Words] and orthodontic [Words]                       | 12 |
| 3. gingival crevicular fluid [Words] and orthodontic [Words] | 9  |
| 4. bone turnover [Words] and orthodontic [Words]             | 40 |
| 5. periodontal biomarker [Words] and orthodontic [Words]     | 0  |

## Cochrane Library search

#1

(biomarker):ti,ab,kw AND (orthodont\*):ti,ab,kw

(biomarker):ti,ab,kw AND (orthodont\*):ti,ab,kw

(Word variations have been searched)

29

#2

(GCF):ti,ab,kw AND (orthodont\*):ti,ab,kw

(GCF):ti,ab,kw AND (orthodont\*):ti,ab,kw

(Word variations have been searched)

69

#3

("bone turnover marker"):ti,ab,kw AND (orthodont\*):ti,ab,kw

("bone turnover marker"):ti,ab,kw AND (orthodont\*):ti,ab,kw

(Word variations have been searched)

1

#4

("gingival crevicular fluid"):ti,ab,kw AND (orthodont\*):ti,ab,kw

("gingival crevicular fluid"):ti,ab,kw AND (orthodont\*):ti,ab,kw

(Word variations have been searched)

90

## Medline (via Ovid)

|                                                     |     |
|-----------------------------------------------------|-----|
| 1. (biomarker and orthodont*).ab.                   | 32  |
| 2. (GCF and orthodont*).ab.                         | 194 |
| 3. (gingival crevicular fluid and orthodont*).ab.   | 231 |
| 4. (bone turnover and orthodont*).ab.               | 76  |
| 5. Gingival crevicular fluid.sh. and orthodont*.ab. | 208 |
| 6. orthodont*.sh. and GCF.ab.                       | 94  |

## Embase (via Ovid)

|                                                     |     |
|-----------------------------------------------------|-----|
| 1. (biomarker and orthodont*).ab.                   | 38  |
| 2. (GCF and orthodont*).ab.                         | 197 |
| 3. (gingival crevicular fluid and orthodont*).ab.   | 240 |
| 4. (bone turnover and orthodont*).ab.               | 81  |
| 5. gingival crevicular fluid.af. and orthodont*.ab. | 249 |
